# Supplementary material for: Regulation of STAT1 and STAT4 Expression by Growth Factor and Interferon Supplementation in Sjögren’s Syndrome Cell Culture Models
Source: MDPI journal article supplement (doi:10.3390/ijms25063166), 2024-03-09
Supplement: s1 [file s1]

**Supplementary Table S1.** Primer sequences, both forward and reverse, used in qRT-PCR. Primers were designed with ncbi Primer-BLAST tool and ordered from Integrated DNA Technologies (IDT, Coralville, IA, USA). The full primer sequences are listed here in 5'-3' orientation along with their associated target gene.

| Target  | Primer Sequence             |
|---------|-----------------------------|
| STAT4-F | 5'-GGTGGGAACTGACCCAAGTA-3'  |
| STAT4-R | 5'- AGACATGCTAGCGCTCTCTC-3' |
| STAT1-F | 5'-CTGTGCGTAGCTGCTCCTTT-3'  |
| STAT1-R | 5'- CCACTGAGACATCCTGCCAC-3' |
| GAPDH-F | 5'-AGGGCTGCTTTTAACTCTGGT-3' |
| GAPDH-R | 5'-CCCCACTTGATTTTGGAGGGA-3' |

**Supplementary Table S2.** Antibodies for Western blot listed here with source, species and dilution used. Final dilution for each antibody was determined by trial and error and initial dilutions determined by recommendation from the vendor. Primary antibodies were selected based on Western blot quality. Secondary antibodies were applied according to the species of each primary antibody.

| Target              | Assay | Species | Source | Cat#      | Dilution |
|---------------------|-------|---------|--------|-----------|----------|
| STAT4               | WB    | Mouse   | SCBT   | Sc-398228 | 1:100    |
| STAT1               | WB    | Mouse   | SCBT   | SC-464    | 1:200    |
| P-STAT4             | WB    | Mouse   | SCBT   | SC-28296  | 1:100    |
| P-STAT1             | WB    | Rabbit  | CST    | 91675     | 1:1000   |
| IRF1                | WB    | Mouse   | SCBT   | SC-514544 | 1:100    |
| Cofilin             | WB    | Mouse   | SCBT   | SC-376476 | 1:100    |
| Cyclophilin B       | WB    | Mouse   | SCBT   | SC-130626 | 1:200    |
| GAPDH               | WB    | Mouse   | SCBT   | SC-47724  | 1:200    |
| Anti-mouse IgG-HRP  | WB    | Horse   | CST    | 7076S     | 1:3000   |
| Anti-rabbit IgG-HRP | WB    | Goat    | CST    | 7074S     | 1:3000   |

CST is Cell Signaling Technology; SCBT is Santa Cruz Biotechnology
